# Supplementary material for: Incidence and prevalence of intravenous medication errors in the UK: a systematic review
Source: PubMed Central journal article supplement — Eur J Hosp Pharm. 2018 Oct 23;27(1):3–8. doi: 10.1136/ejhpharm-2018-001624 (PMC6992970; doi:10.1136/ejhpharm-2018-001624), 2018-10-23
Supplement: ejhpharm-2018-001624supp001.pdf [file ejhpharm-2018-001624supp001.pdf]

Supplementary File 1 – Search Strategy

| Search term                                                     | No. results |         |          |
|-----------------------------------------------------------------|-------------|---------|----------|
|                                                                 | Medline     | Embase  | Cochrane |
| Critical care (TI;AB)                                           | 189447      | 665419  | 15891    |
| OR oncology department (TI;AB)                                  | 2180529     | 3975947 | 124409   |
| OR all hospital departments (TI;AB)                             | 2403906     | 4138691 | 135733   |
| AND IV infusions (TI; AB; exp)                                  | 87207       | 198814  | 15013    |
| AND Medication errors (TI; AB)                                  | 573         | 983     | 35       |
| AND Incidence/Frequency/Prevalence of medication errors (TI;AB) | 113         | 80      | 0        |
